# Supplementary material
Source: publisher figshare collection journal article supplement (https://karger.figshare.com/articles/dataset/_/4772158)
Supplement: Supplementary file 3 [file 1]

**Legends to supplemental files:**

Supplemental file 1: Details of clinical features of subjects

Supplemental file 2: Details of sepsis screening

Supplemental file 3: Methods of measurement of neutrophil CD64 expression and CRP

Supplemental file 4: Table A. Final clinical diagnoses of study infants

Supplemental file 5 ( Figure A): ROC curves of CD64 and CRP (WCC is included for comparison) at T1 for diagnosing patients with intra-abdominal sepsis (post-op subjects excluded, n = 279)
