# Supplementary material
Source: publisher figshare collection journal article supplement (https://karger.figshare.com/articles/dataset/_/4772158)
Supplement: Supplementary file 5 [file 1]

**Supplemental file 4: Table A. Clinical diagnoses of study infants**

| Group 1 (Intra-abdominal sepsis), n = 102                    |                | Group 2 (Extra-abdominal sepsis), n = 34 |                | Group 3 (Non-sepsis), n = 174                      |                |
|--------------------------------------------------------------|----------------|------------------------------------------|----------------|----------------------------------------------------|----------------|
| Diagnosis                                                    | No. of infants | Diagnosis                                | No. of infants | Diagnosis                                          | No. of infants |
| <i>Focal intestinal perforation:</i>                         |                |                                          |                |                                                    |                |
| <i>Septicemia:</i>                                           |                |                                          |                |                                                    |                |
| Stomach                                                      | 1              | Coagulase negative staphylococcus        | 4              | <i>Esophagus:</i>                                  |                |
| Jejunum                                                      | 1              | Staphylococcus aureus                    | 2              | Esophageal atresia with tracheo-esophageal fistula | 9              |
| Ileum                                                        | 21             | Enterococcus species                     | 1              |                                                    |                |
| Sigmoid colon                                                | 1              | Escherichia coli                         | 2              | <i>Stomach:</i>                                    |                |
|                                                              |                | Klebsiella pneumoniae                    | 2              | Aerophagia                                         | 2              |
| <i>Enterocolitis:</i>                                        |                |                                          |                |                                                    |                |
| Non-specific enterocolitis*                                  | 4              | Enterobacter species                     | 2              | Non-specific gastritis†                            | 17             |
| Hirschsprung disease associated colitis                      | 5              | Pseudomonas aeruginosa                   | 1              | Pyloric stenosis                                   | 1              |
| Necrotizing enterocolitis                                    | 55             | Serratia species                         | 1              |                                                    |                |
|                                                              |                | Bacillus species                         | 1              | <i>Duodenum:</i>                                   |                |
|                                                              |                | Candida parapsilosis                     | 1              | Duodenal atresia                                   | 3              |
| <i>Peritonitis:</i>                                          |                |                                          |                |                                                    |                |
| Intestinal atresia with peritonitis/perforation              | 6              | <i>Urinary tract infection:</i>          |                | Duodenal stenosis                                  | 1              |
| Intestinal malrotation with volvulus and intestinal necrosis | 2              | Enterococcus species                     | 1              | Duodenal web                                       | 1              |
|                                                              |                | Escherichia coli                         | 2              | <i>Jejunum:</i>                                    |                |
| Anastomotic leak with peritonitis                            | 2              | Klebsiella pneumoniae                    | 1              | Jejunal atresia                                    | 1              |
| Long line extravasation with peritonitis                     | 1              | Candida albicans                         | 2              | Jejunal stenosis                                   | 3              |
| Stomach necrosis                                             | 2              |                                          |                |                                                    |                |
| <i>Ileum:</i>                                                |                |                                          |                |                                                    |                |
| <i>Pneumonia:</i>                                            |                |                                          |                |                                                    |                |
| <i>Group B Streptococcus</i>                                 |                |                                          |                |                                                    |                |
|                                                              |                |                                          | 3              | Ileal atresia                                      | 5              |
| <i>Meningitis:</i>                                           |                |                                          |                |                                                    |                |
| <i>Coagulase negative staphylococcus</i>                     |                |                                          |                |                                                    |                |
|                                                              |                |                                          | 1              | Intestinal atresia - multiple sites                | 2              |
| <i>Group B Streptococcus</i>                                 |                |                                          |                |                                                    |                |
|                                                              |                |                                          | 1              | Ileal stricture                                    | 1              |
| <i>No organism identified</i>                                |                |                                          |                |                                                    |                |
|                                                              |                |                                          | 2              | Ileostomy bleeding                                 | 1              |
|                                                              |                |                                          |                | Intestinal duplication cyst                        | 2              |
|                                                              |                |                                          |                | Intestinal malrotation                             | 6              |
|                                                              |                |                                          |                | Meconium plug, ileus                               | 2              |
| <i>Others:</i>                                               |                |                                          |                |                                                    |                |
| Liver abscess with Staph epidermidis septicemia              | 1              |                                          |                |                                                    |                |

*Others:*

|                                          |   |                                                          |    |
|------------------------------------------|---|----------------------------------------------------------|----|
| Clinical sepsis - no organism identified | 3 | <i>Colon:</i>                                            |    |
| Facial cellulitis                        | 1 | Hirschsprung disease                                     | 3  |
|                                          |   | Total colonic aganglionosis with small bowel involvement | 1  |
|                                          |   | <i>Anal:</i>                                             |    |
|                                          |   | Anal fissure                                             | 8  |
|                                          |   | Imperforate anus                                         | 9  |
|                                          |   | <i>Others:</i>                                           |    |
|                                          |   | Coccygeal teratoma                                       | 1  |
|                                          |   | Congenital diaphragmatic hernia                          | 6  |
|                                          |   | Gastroschisis                                            | 2  |
|                                          |   | Gastrointestinal dysmotility of prematurity              | 51 |
|                                          |   | Inguinal hernia                                          | 1  |
|                                          |   | Non-specific abdominal distension <sup>#</sup>           | 26 |
|                                          |   | Omphalocele                                              | 2  |
|                                          |   | Paralytic ileus secondary to hypokalemia                 | 2  |
|                                          |   | Swallowed maternal blood                                 | 4  |
|                                          |   | Severe anemia                                            | 1  |

**Note:** In Group 1: \*Non-specific enterocolitis cases were those infants who passed a significant amount of mucus and fresh blood per rectum, but with no radiologic evidence of NEC, and did not require surgery. In Group 3: †Non-specific gastritis was presumably stress-related; ‡Non-specific abdominal distension cases were those infants with generalized dilated bowel segments but without clinical or radiologic features of NEC or bowel inflammation
